# Supplementary material
Source: PubMed Central journal article supplement (PMC2797908)

# Supplemental figure

The late EPC colonies after plating 2-4 weeks

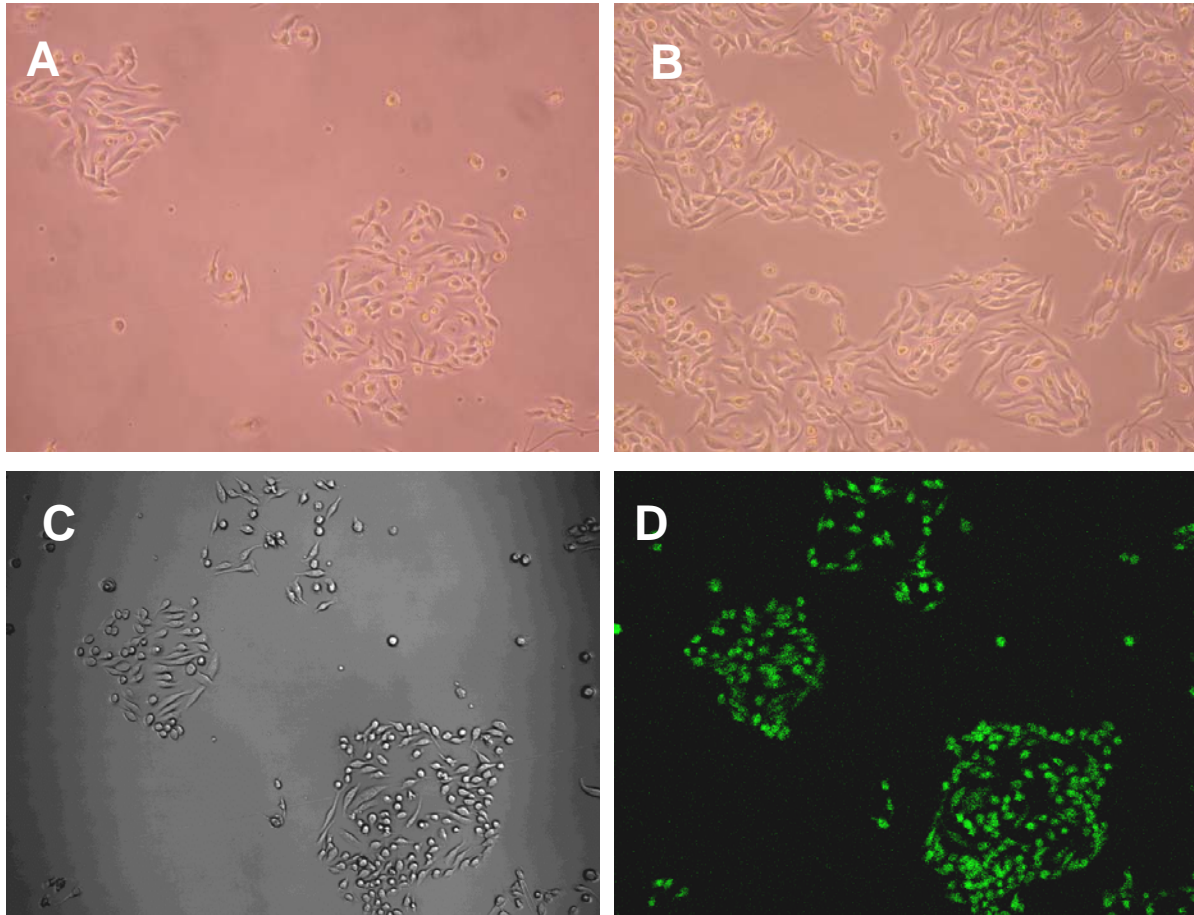

Supplement: mmc1.pdf [file mmc1.pdf]
